# Supplementary material
Source: ML conference proceedings conference paper supplement (https://openaccess.thecvf.com/content/cvpr_2017/html/Bautista_Deep_Unsupervised_Similarity_2017_CVPR_paper.html)
Supplement: Supplementary file 1 [file Bautista_Deep_Unsupervised_Similarity_2017_CVPR_supplemental.pdf]

Archive with 11 entries (8 files):
- 3350_supplementary/
- 3350_supplementary/CVPR17_supp.pdf
- __MACOSX/
- __MACOSX/3350_supplementary/
- __MACOSX/3350_supplementary/._CVPR17_supp.pdf
- 3350_supplementary/reconstruction_high_jump.avi
- __MACOSX/3350_supplementary/._reconstruction_high_jump.avi
- 3350_supplementary/reconstruction_long_jump.avi
- __MACOSX/3350_supplementary/._reconstruction_long_jump.avi
- 3350_supplementary/reconstruction_snatch.avi
- __MACOSX/3350_supplementary/._reconstruction_snatch.avi
